# Supplementary material for: The Hepatic Microenvironment and TRAIL-R2 Impact Outgrowth of Liver Metastases in Pancreatic Cancer after Surgical Resection
Source: PubMed Central journal article supplement (PMC6627672; doi:10.3390/cancers11060745), 2019-05-29
Supplement: cancers-11-00745-s001.pdf [file cancers-11-00745-s001.pdf]

# Supplementary Materials: The Hepatic Microenvironment and TRAIL-R2 Impact Outgrowth of Liver Metastases in Pancreatic Cancer after Surgical Resection

Lauritz Miarka <sup>1,†</sup>, Charlotte Hauser <sup>2,†</sup>, Ole Helm <sup>1</sup>, Dörthe Holdhof <sup>3,4</sup>, Silje Beckinger <sup>1</sup>, Jan-Hendrik Egberts <sup>2</sup>, Jan-Paul Gundlach <sup>2</sup>, Lennart Lenk <sup>5</sup>, Sascha Rahn <sup>1</sup>, Wolfgang Mikulits <sup>6</sup>, Anna Trauzold <sup>1,2,‡</sup> and Susanne Sebens <sup>1,‡,\*</sup>

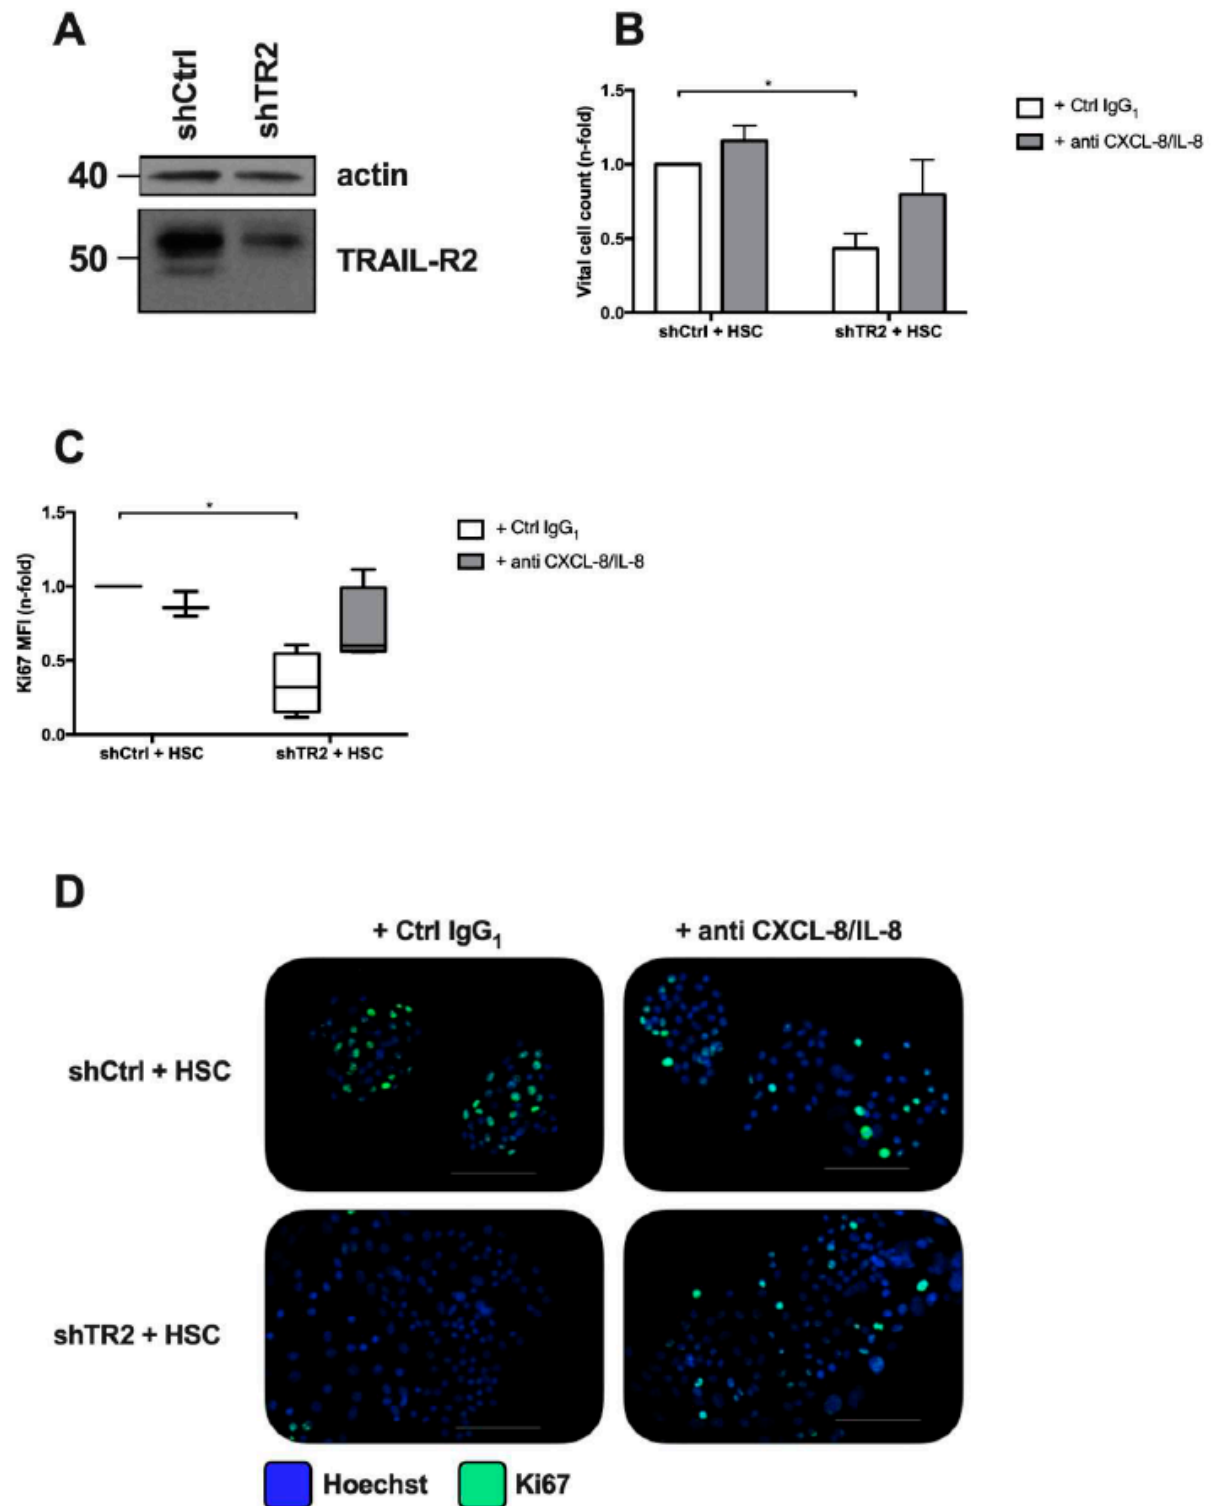

**Figure S1.** HSC-mediated growth suppression of Colo357 shTR2 cells is CXCL-8/IL-8 dependent. **(A)** ShRNA-mediated knockdown of TRAIL-R2 in Colo357 cells was verified on protein level by Western blot. Actin levels were used as loading control. For blocking experiments, Colo357 shCtrl and Colo357 shTR2 cells were indirectly cocultured in the presence of HSC and treated with either 10  $\mu\text{g}/\text{mL}$  control IgG<sub>1</sub> or anti-CXCL-8/IL-8 antibody. After 6 days of coculture, **(B)** vital cell count and **(C)** the proportion of Ki67<sup>+</sup> cells were determined. The percentage of proliferating cells was determined by immunofluorescence Ki67-AlexaFluor488 staining. Data are normalized to control group shCtrl + HSC + control IgG<sub>1</sub>. **(D)** Representative images of immunofluorescence Ki67 staining are shown. Scale Bars 100  $\mu\text{m}$ . Data represent the mean  $\pm$  SEM or median values with quartiles (Q<sub>0.75</sub> as upper, Q<sub>0.25</sub> as lower deviation) of 3–4 independent experiments; \* =  $p < 0.05$ .
